# Supplementary material
Source: HighWire-hosted journal article supplement (https://bjsm.bmj.com/content/54/23/1382)
Supplement: inline-supplementary-material-2 [file inline-supplementary-material-2.pdf]

**Appendix 2: Number of studies excluded as full texts, with reasons.**

| <b>Reason for exclusion</b>                           | <b>Number of studies</b> |
|-------------------------------------------------------|--------------------------|
| Population of hip osteoarthritis                      | 18                       |
| Conference abstract                                   | 13                       |
| No patient-reported outcomes used                     | 13                       |
| Review/systematic review/clinical commentary          | 5                        |
| Not investigating hip (eg: knee, shoulder)            | 5                        |
| No physiotherapy intervention                         | 5                        |
| Less than 10 subjects overall                         | 3                        |
| Non-English                                           | 3                        |
| No intervention tested                                | 2                        |
| Mean age of participants <18 years                    | 1                        |
| <b>Total number of studies excluded as full texts</b> | <b>68</b>                |
